# Supplementary material
Source: Springer Nature journal article supplement (https://www.springermedizin.de/resource/supplementary/13063_2012_1098_MOESM1_ESM.pdf/9619700)
Supplement: MOESM1 [file 9619700]

# CRITICAL MASS

NATIONAL LAWS ◦ MEDIA ◦ NATIONAL POLICIES

RELIGIOUS LEADERS ◦ TEACHERS ◦ JUDGES  
COMMUNITY GROUPS ◦ SOCIAL WELFARE OFFICERS  
LOCAL LEADERS ◦ NGOs

RELATIVES ◦ ELDERS ◦ FRIENDS  
IN-LAWS

WOMEN  
MEN

NEIGHBORS  
FAMILY

individual  
relationship  
community

society

REGIONAL AND INTERNATIONAL AGREEMENTS ◦ FUNDING  
POLICE ◦ HEALTH CARE PROVIDERS  
BUSINESS OWNERS  
CULTURAL LEADERS
